# Supplementary material
Source: publisher figshare collection journal article supplement (https://gsapubs.figshare.com/ndownloader/files/23297531)
Supplement: Supplementary file 1 [file 23297531]

## Sheet: Sheet1
TABLE DR1: WHOLE-ROCK ANALYSES OF MINERALIZED ROCKS FROM BASE-METAL SULFIDE DEPOSITS OF THE NOME COMPLEX, SEWARD PENINSULA, ALASKA
Sample No.	Deposit	Location(1)		Mineralogy	SiO2	Al2O3	Fe2O3T	MnO	MgO	CaO	Na2O	K2O	TiO2	P2O5	LOI	Total	F	C-Total	C-Graphitic	C-Organic	TOC	CO2	Total S	SO4	Be	V	Cr	Sc	Ni	Co	Cu	Zn	Ag	Pb	Hg	Au	As	Se	Sb	Ga	Ge	Rb	Sr	Zr	Nb	Mo	In	Sn	Cs
		Latitude	Longitude		wt %	wt %	wt %	wt %	wt %	wt %	wt %	wt %	wt %	wt %	wt %	wt %	wt %	wt %	wt %	wt %	wt %	wt %	wt %	wt %	ppm	ppm	ppm	ppm	ppm	ppm	ppm	ppm	ppm	ppm	ppb	ppb	ppm	ppm	ppm	ppm	ppm	ppm	ppm	ppm	ppm	ppm	ppm	ppm	ppm
JS-04-5A	Quarry	64 42.07	165 46.00	Quartz-fluorite-galena-sphalerite-sulfosalt	67.1	0.6	13.63	0.3	0.05	2.39	0.08	0.02	0.022	0.09	5.67	89.95	3.3	0.46	< 0.05	0.49	0.49	1.43	0.24	0.88	< 1	< 5	< 5	0.8	5	1	162	9360	113	87300	1350	18	35.6	< 3	240	1	5.6	< 1	142	7	0.5	< 2	0.7	10	0.1
JS-06-1D	Quarry	64 42.07	165 46.00	Iron oxides and Zn-Pb carbonates (oxidized)	12.36	0.03	53.44	1.569	0.17	10.8	0.01	< 0.01	< 0.001	0.03	14.52	92.93	0.04	2.69	< 0.05	0.2	0.2	9.2	0.01	< 0.1	< 1	< 5	20	1	8	< 1	28	15400	1.9	4560	952	< 2	5.3	< 3	5.8	< 1	1.4	< 1	53	< 4	0.6	3	0.9	< 1	< 0.1
JS-06-1G	Quarry	64 42.07	165 46.00	Barite-quartz-fluorite-calcite-sulfide	35.09	0.26	1.16	0.05	0.13	8.66	0.11	0.12	0.01	0.04	5.96	51.59	8.36	0.57	< 0.05	< 0.05	< 0.05	1.77	7.89	23.7	< 1	7	< 5	0.5	18	4	28	1330	4.7	2260	466	< 2	22.9	< 3	99.9	< 1	4.1	< 1	3209	< 4	1.3	6	< 0.1	< 1	0.2
JS-06-1I	Quarry	64 42.07	165 46.00	Quartz-galena-sphalerite-sulfosalt	86.6	0.55	5.34	0.075	0.03	0.55	0.04	< 0.01	0.004	0.03	2.12	95.33	0.17	0.32	< 0.05	0.14	0.14	0.85	0.22	0.6	< 1	< 5	60	0.4	4	< 1	67	1850	55.2	47000	1550	< 2	107	< 3	99	< 1	8.5	< 1	37	5	< 0.2	2	0.5	5	< 0.1
JS-06-1M	Quarry	64 42.07	165 46.00	Barite-calcite	0.21	< 0.01	0.63	0.125	0.06	36.28	0.1	< 0.01	< 0.001	< 0.01	26.51	63.74	0.03	7.98	< 0.05	< 0.05	< 0.05	27.5	6.95	19.5	< 1	< 5	< 5	0.4	4	< 1	207	51	2	38	74	< 2	30.6	< 3	54.4	< 1	< 0.5	< 1	4446	< 4	< 0.2	< 2	< 0.1	< 1	< 0.1
JS-07-1C	Quarry	64 42.18	165 46.08	Quartz-fluorite-calcite-galena-sulfosalt	64.13	0.65	1.03	0.031	0.63	16.69	0.07	0.03	0.019	0.03	6.76	90.06	10.9	0.7	< 0.05	0.08	0.08	2.34	1.12	3.1	< 1	5	162	0.6	< 20	1	30	790	100	98900	890	13	2.5	< 3	104	1	6.3	2	42	12	1.1	14	< 0.1	< 1	< 0.1
JS-07-1D	Quarry	64 42.18	165 46.08	Fluorite-quartz-calcite-galena-sulfosalt	37.34	1.01	0.79	0.024	0.35	37.41	0.03	0.06	0.004	0.04	6.56	83.63	26.2	0.53	< 0.05	0.1	0.1	1.73	0.56	1.6	3	< 5	< 5	1.2	< 20	1	50	470	70	53700	226	15	3.9	< 3	68.5	1	3.9	1	114	6	1.6	4	< 0.1	< 1	< 0.1
JS-05-78B	Galena	64 44.32	165 49.09	Quartz-calcite-galena	89.85	0.5	1.3	0.047	0.04	4.15	0.06	< 0.01	0.004	0.07	4.44	100.5	0.03	1.06	< 0.05	0.11	0.11	3.82	0.25	--	< 1	< 5	40	0.9	3	< 1	19	535	50.1	52000	83	< 2	14.6	< 3	60.2	< 1	10	2	55	< 4	< 0.2	< 2	< 0.1	< 1	0.4
JS-05-79A	Galena	64 44.13	165 49.32	Quartz-graphite-sphalerite	48.85	0.46	13.74	0.23	0.27	0.46	0.08	0.07	0.009	< 0.01	12.02	76.14	0.03	2.09	< 0.05	2.14	2.14	< 0.01	2.16	0.55	< 1	< 5	< 5	1	3	3	10	160000	1.8	93	24500	36	6.6	< 3	3	4	3.4	3	11	< 4	0.4	< 2	0.1	6	0.3
JS-05-81A	Galena	64 43.89	165 48.97	Quartz-siderite-graphite-sphalerite	26.98	0.19	4.53	0.059	0.89	1.59	< 0.01	< 0.01	0.001	< 0.01	19.92	54.14	0.05	4.36	< 0.05	4.74	4.74	16.4	4.51	0.61	< 1	< 5	25	0.7	5	6	28	301000	3.5	94	99200	< 2	< 0.5	< 3	2.7	16	5.3	2	6	< 4	< 0.2	< 2	1.3	26	0.7
JS-07-22A	Galena	64 44.27	165 49.28	Quartz-calcite-galena	87.35	0.59	0.78	0.041	0.21	5.01	0.06	0.14	0.011	0.08	5.26	99.54	0.02	1.19	< 0.05	< 0.05	< 0.05	4.12	0.16	0.5	< 1	< 5	< 5	0.4	< 20	2	60	170	11.6	18300	721	104	9.1	< 3	17.3	1	6.7	2	42	1	< 0.2	< 2	< 0.1	< 1	0.5
JS-04-13A	Wheeler South	64 54.98	164 38.30	Quartz-siderite-chalcopyrite-bornite-sulfosalt (oxidized)	32.83	0.22	25.35	0.005	0.01	0.12	0.09	0.04	0.001	0.04	14.16	72.87	0.03	1.59	< 0.05	1.49	1.49	5.28	1.87	0.08	< 1	< 5	< 5	0.6	21	1	221000	93	21.9	184	1480	49	93.6	< 3	766	1	7.1	1	11	< 4	< 0.2	3	10.3	327	< 0.1
JS-04-13D	Wheeler South	64 54.98	164 38.30	Quartz-calcite-chalcopyrite-bornite-sulfosalt (oxidized)	24.24	0.09	11.32	0.193	0.12	26.37	0.08	< 0.01	0.001	< 0.01	19.59	82.01	< 0.01	6.03	< 0.05	0.69	0.69	22	0.68	2.38	< 1	< 5	18	1	16	< 1	82600	81	10.1	82	227	34	18.5	< 3	19.4	< 1	2.5	< 1	60	< 4	< 0.2	3	3.9	82	< 0.1
JS-05-71A	Copper Mountain	64 52.36	165 12.42	Quartz-pyrite-chalcopyrite-sulfosalt	80.83	0.26	9.16	0.005	0.09	0.53	0.12	0.04	0.033	0.17	6.02	97.26	0.04	0.1	< 0.05	< 0.05	< 0.05	0.29	7.07	0.33	< 1	< 5	33	0.5	14	4	18400	248	11.4	44	5860	873	161	< 3	453	< 1	1.1	< 1	13	6	0.7	51	0.3	12	0.6
JS-07-20D	Copper Mountain	64 52.33	165 12.58	Quartz-pyrite-chalcopyrite-sulfosalt	77.87	0.19	7.11	0.027	0.18	1.64	0.03	0.01	0.011	0.04	4.55	91.66	0.04	0.42	0.07	< 0.05	0.07	1.37	5.87	6.5	< 1	< 5	178	0.2	< 20	2	45100	490	15.5	1120	10500	511	140	5	220	1	0.9	< 1	9	< 1	< 0.2	2	0.2	9	0.2
JS-05-66A	Aurora Creek	64 42.14	165 35.01	Barite-calcite-quartz-sphalerite-pyrite	33.1	0.34	1.79	0.082	2.29	10.8	< 0.01	0.07	0.011	< 0.01	11.81	60.29	0.08	3.19	< 0.05	< 0.05	< 0.05	11.4	6.43	18.9	1	< 5	< 5	0.7	6	< 1	24	4770	< 0.5	243	237	< 2	3.8	< 3	4.9	< 1	4.7	3	1363	11	0.8	< 2	< 0.1	< 1	0.4
JS-05-66B	Aurora Creek	64 42.14	165 35.01	Barite-quartz-calcite-sphalerite-pyrite	15.86	0.14	0.69	0.023	0.5	3.33	< 0.01	0.02	0.003	< 0.01	3.64	24.2	0.03	0.99	< 0.05	0.72	0.72	3.39	12.3	37	< 1	6	< 5	0.2	4	< 1	25	2920	< 0.5	100	279	13	2.3	< 3	0.7	< 1	1.6	< 1	2057	3	< 0.2	< 2	< 0.1	< 1	0.1
AC-8-60.0	Aurora Creek	64 42.85	165 35.89	Quartz-siderite-dolomite-chlorite-chloritoid-sphalerite-pyrite	42.1	0.88	26.67	0.745	4.27	8.32	0.02	0.05	0.04	< 0.01	16.26	98.72	0.03	4.03	< 0.05	< 0.05	< 0.05	14	12.7	14.3	< 1	11	< 5	1.6	6	3	81	56100	1.2	14	2210	52	523	< 3	19.4	4	2.7	4	34	18	0.8	< 2	0.3	< 1	0.5
AC-8-60.5	Aurora Creek	64 42.85	165 35.89	Quartz-siderite-dolomite-sphalerite	35.93	1.09	17.44	0.481	3.67	8.44	0.08	0.17	0.074	< 0.01	14.74	81.91	0.06	5.24	< 0.05	< 0.05	< 0.05	19.5	4.68	10.4	< 1	7	25	2.4	9	6	18	79700	1.6	34	5330	46	38.7	< 3	8.6	8	3.5	9	42	22	1.2	< 2	0.4	12	1.7
AC-8-64.0	Aurora Creek	64 42.85	165 35.89	Quartz-siderite-dolomite-pyrite-sphalerite-arsenopyrite	49.24	1.72	15.91	0.544	5.71	12.06	0.04	0.29	0.096	< 0.01	13.38	98.6	0.11	4.51	< 0.05	< 0.05	< 0.05	16.9	7.09	6.04	< 1	17	23	3	21	15	25	12100	0.8	41	182	20	1630	< 3	45.5	4	1.9	16	88	31	1.5	< 2	0.2	< 1	3.4
AC-9-173.5	Aurora Creek	64 42.77	165 35.81	Quartz-siderite-dolomite-pyrite-sphalerite	24.27	1.03	26.7	0.793	6.98	15.24	< 0.01	0.05	0.045	< 0.01	17.5	92.41	0.05	6.98	< 0.05	0.08	0.08	27.7	6.45	9.55	< 1	12	24	3	14	8	86	11500	1	19	435	66	28.4	< 3	16.8	3	1.6	3	124	17	0.9	< 2	0.2	3	0.2
AC-9-182.0	Aurora Creek	64 42.77	165 35.81	Calcite-dolomite-ankerite-quartz-sphalerite	15.49	0.31	13.06	0.446	9.86	23.89	< 0.01	0.05	0.004	0.06	35.47	98.64	0.04	9.85	< 0.05	< 0.05	< 0.05	36.7	0.06	--	< 1	6	< 5	1.9	1	< 1	7	2460	0.8	25	323	17	8.5	< 3	6.5	< 1	2.3	5	81	< 4	< 0.2	< 2	0.1	8	0.8
AC-9-202.0	Aurora Creek	64 42.77	165 35.81	Siderite-dolomite-quartz-sphalerite	28.12	0.54	26.42	0.663	5.07	7.49	0.02	0.07	0.034	< 0.01	20.37	88.8	0.04	7	< 0.05	0.1	0.1	27.7	2.3	6.62	< 1	6	18	2.3	11	7	30	41800	0.7	17	5310	38	11.9	< 3	2.3	3	2.2	7	30	10	0.7	< 2	0.7	9	1.2
AC-17-102.0	Aurora Creek	64 42.82	165 35.85	Dolomite-siderite-quartz-sphalerite-pyrite-gold	5.25	0.44	18.66	0.567	8.12	20.21	< 0.01	0.05	0.048	< 0.01	23.79	76.98	0.03	9.43	< 0.05	< 0.05	< 0.05	31.9	6.03	14.8	< 1	7	< 5	1.7	4	3	64	59800	1.3	17	5560	3320	122	< 3	3.2	2	< 0.5	7	141	15	1.1	< 2	0.7	2	0.8
AC-17-106.5	Aurora Creek	64 42.82	165 35.85	Dolomite-siderite-quartz-pyrite-sphalerite-gold	8.83	0.83	25.91	0.65	9.19	17.73	0.04	0.16	0.004	< 0.01	14.12	76.7	0.05	7.9	< 0.05	0.06	0.06	28.8	11.8	19.4	< 1	14	< 5	1.8	7	1	79	59700	1.4	11	6190	8660	285	< 3	4	3	< 0.5	11	186	< 4	0.2	< 2	1	< 1	1.1
JS-06-14	Aurora Creek	64 42.79	165 35.62	Quartz-hyalophane-pyrite-sphalerite-galena-chalcopyrite	85.19	2.76	3.4	0.006	0.1	0.03	0.04	0.35	0.157	0.03	3.42	95.5	0.06	0.07	< 0.05	< 0.05	< 0.05	0.04	1.67	0.5	< 1	14	190	1.4	11	4	655	8290	6.8	7810	2490	116	67.6	< 3	255	6	6.2	15	73	113	2.9	3	1	7	1.2
JS-06-17A	Aurora Creek	64 43.46	165 35.88	Quartz-hyalophane-siderite-barite-pyrite-sphalerite-galena	84.65	2.65	5.33	0.118	0.4	1.1	0.03	0.09	0.118	0.06	3.58	98.12	0.03	0.77	< 0.05	0.06	0.06	2.18	0.85	1.4	< 1	9	114	2.2	11	6	136	13700	6.5	1080	828	18	19	< 3	10.9	5	7.8	4	94	48	3.5	2	0.1	< 1	0.2
JS-06-17B	Aurora Creek	64 43.46	165 35.88	Quartz-muscovite-sphalerite	84.53	1.82	3.9	0.033	0.16	0.09	0.04	0.48	0.081	0.05	2.04	93.22	0.08	0.25	< 0.05	0.1	0.1	0.58	0.71	< 0.1	< 1	7	< 5	0.9	7	4	67	40200	< 0.5	19	3260	32	2.6	< 3	4.1	8	11.4	25	36	46	2.3	< 2	0.5	14	1.8
JS-07-2A	Aurora Creek	64 42.15	165 35.00	Dolomite-sphalerite-galena-sulfosalt	3.07	0.88	4.21	0.224	18.35	28.9	< 0.01	0.18	0.009	0.12	37.82	93.72	0.04	11.6	< 0.05	0.21	0.21	44	1.79	4.8	< 1	7	< 5	1.6	< 20	2	30	37300	0.8	1990	7560	< 2	< 0.5	< 3	503	2	< 0.5	5	281	6	0.2	< 2	0.5	< 1	0.2
JS-07-2C	Aurora Creek	64 42.15	165 35.00	Quartz-barite-dolomite-sphalerite	31.95	0.34	2.26	0.083	2.37	11.18	< 0.01	0.11	0.011	< 0.01	11.44	59.71	0.04	3.54	< 0.05	0.08	0.08	12.6	6.34	16.3	1	< 5	43	0.6	< 20	< 1	30	12000	< 0.5	400	1210	< 2	2.4	< 3	9.9	1	3.2	2	1148	10	< 0.2	3	< 0.1	< 1	0.2
JS-07-3A	Aurora Creek	64 42.11	165 35.02	Quartz (metaexhalite)	93.29	1.06	1.62	0.019	0.46	0.58	0.02	0.33	0.057	0.02	1.88	99.34	0.08	0.27	< 0.05	< 0.05	< 0.05	1	0.72	0.9	1	6	14	1.2	< 20	35	30	2990	1.2	894	166	< 6	71.6	< 3	15.9	3	15.9	13	79	47	1.2	2	< 0.1	1	1.9
JS-07-8A	Aurora Creek	64 42.99	165 35.99	Dolomite-siderite-quartz-sphalerite	34.8	0.69	9.61	0.299	4.86	13.87	< 0.01	0.21	0.032	0.02	14.77	79.14	0.03	6.26	0.05	< 0.05	0.05	22.4	3.73	7.9	< 1	5	< 5	1.8	< 20	4	30	63700	< 0.5	28	8750	< 2	1	< 3	3.7	4	1.3	9	70	13	0.6	< 2	1.7	13	1.9
JS-07-8C	Aurora Creek	64 42.99	165 35.99	Quartz-barite-ankerite-pyrite-sphalerite	84.47	1.61	5.22	0.005	0.16	0.32	0.09	0.38	0.075	0.02	3.72	96.06	0.33	0.03	< 0.05	< 0.05	< 0.05	0.02	5.16	2.3	< 1	7	130	0.4	30	9	170	11800	2.2	745	2650	< 2	91	< 3	35.3	9	10.1	14	74	38	1.3	10	0.4	6	0.9
JS-07-8D	Aurora Creek	64 42.99	165 35.99	Dolomite-siderite-quartz-sphalerite	40.57	0.57	8.33	0.264	4.65	11.95	< 0.01	0.18	0.031	0.03	10.78	77.33	0.03	5.29	< 0.05	< 0.05	< 0.05	21.7	4.65	9.4	< 1	7	< 5	1.6	< 20	6	10	79400	0.6	21	15100	< 2	2.5	< 3	1.1	4	1.2	6	83	10	0.4	< 2	0.3	2	1.2
JS-07-8E	Aurora Creek	64 42.99	165 35.99	Dolomite-siderite-quartz-chlorite-sphalerite-pyrite	42.74	1.33	14.06	0.434	4.67	13.09	< 0.01	0.09	0.08	0.05	16.94	93.49	0.02	5.84	< 0.05	0.32	0.32	21.9	1.58	4.3	< 1	13	62	2.1	< 20	5	30	34100	< 0.5	16	1880	< 2	4.9	< 3	2.6	6	1.9	4	140	45	1.1	< 2	0.7	21	0.3
JS-07-9	Aurora Creek	64 42.99	165 35.95	Quartz-muscovite-barite-fluorite-sphalerite-pyrite-galena	69.46	10.55	2.61	0.004	0.39	2.08	0.28	2.72	0.496	0.06	4.6	93.24	1.01	0.04	< 0.05	< 0.05	< 0.05	0.13	2.29	3.1	2	39	25	4.5	< 20	8	210	7370	1.1	1780	3700	10	4.2	< 3	13.9	17	3.2	89	338	336	10.6	< 2	0.1	2	8.6
JS-07-23A	Aurora Creek	64 43.00	165 36.11	Dolomite-quartz-fluorite-barite-sphalerite	26.67	0.3	3.1	0.094	2.03	6.9	< 0.01	0.07	0.01	< 0.01	10	49.2	2.6	2.35	< 0.05	0.06	0.06	7.32	15.6	24.6	< 1	< 5	45	0.9	< 20	10	90	301000	< 0.5	62	61500	< 2	10.1	< 3	5.3	11	2.6	2	245	2	< 0.2	< 2	3.3	40	0.1
JS-07-23B	Aurora Creek	64 43.00	165 36.11	Quartz-siderite-muscovite-sphalerite-pyrite	71.29	3.55	8.25	0.193	0.74	3.43	0.05	0.67	0.176	0.19	6.72	95.24	0.06	1.54	0.21	< 0.05	0.21	5.31	2.59	4.2	< 1	14	26	1.6	30	15	60	34500	< 0.5	272	13000	< 2	5.4	< 3	5.2	9	4.1	35	53	51	3	< 2	0.3	11	4.7
JS-07-25	Aurora Creek	64 43.00	165 36.07	Dolomite-siderite-quartz-barite-pyrite-sphalerite	42.59	0.54	13.73	0.288	2.95	7.36	< 0.01	0.3	0.027	< 0.01	11.15	78.91	0.23	3.44	0.12	0.31	0.43	11.9	10.7	14.8	< 1	< 5	< 5	1.2	< 20	9	20	81900	< 0.5	293	19200	< 2	11.2	< 3	2.7	4	3.4	15	259	14	0.4	< 2	2.5	5	6.3
JS-07-26	Aurora Creek	64 43.00	165 36.07	Siderite-dolomite-quartz-magnetite-chlorite-sphalerite	27.12	1.67	28.73	0.662	4.12	8.48	< 0.01	0.23	0.11	0.1	11.19	82.41	0.11	4.93	< 0.05	0.14	0.14	17.6	4.55	10.4	< 1	14	55	1.5	20	11	160	70300	< 0.5	26	13300	< 2	4.5	< 3	3.3	17	2.1	23	52	30	1.4	< 2	0.9	7	21.9
JS-07-27	Aurora Creek	64 43.00	165 36.07	Dolomite-quartz-barite-muscovite-pyrite-sphalerite	50.22	3.03	6.83	0.087	4.96	8.7	0.05	0.81	0.138	< 0.01	12.43	87.25	0.36	3.53	0.1	0.24	0.34	12.6	5.95	12	1	16	17	2.4	< 20	7	20	12000	< 0.5	287	3150	< 2	46.3	< 3	11	6	2.3	35	514	73	2.3	< 2	< 0.1	< 1	4.8
JS-07-33	Wheeler North	64 58.71	164 38.15	Quartz-fluorite-pyrite-sphalerite	66.1	1.25	11.14	< 0.001	0.08	6.04	0.43	0.4	0.074	< 0.01	0	85.45	4.26	0.04	0.09	< 0.05	0.09	0.02	9.37	2.9	< 1	16	151	1.5	< 20	< 1	< 10	660	3.1	321	2460	< 2	17.6	< 3	16.1	< 1	2.7	18	57	27	2.9	< 2	< 0.1	< 1	2.7
JS-04-15B	Wheeler North	64 58.67	164 38.39	Massive pyrite-siderite	0.16	0.04	63.35	0.359	0.14	1.07	< 0.01	0.05	< 0.001	< 0.01	32.14	100.1	0.67	2.19	< 0.05	< 0.05	< 0.05	7.27	46	1.79	< 1	< 5	14	0.8	53	10	380	445	10.7	2980	621	114	397	< 3	134	< 1	< 0.5	< 1	6	6	< 0.2	< 2	< 0.1	< 1	< 0.1
JS-04-15H	Wheeler North	64 58.67	164 38.39	Quartz-calcite-fluorite-sphalerite	49.95	1.75	4.49	0.203	0.33	21.12	0.08	0.52	0.091	0.06	15.97	94.56	4.36	3.8	< 0.05	< 0.05	< 0.05	13.6	4.33	4.02	1	17	14	3.5	6	2	131	17000	6.6	2410	1220	< 2	7.4	< 3	17.3	3	4.3	19	424	28	1.5	< 2	< 0.1	5	0.8
JS-05-77A	Wheeler North	64 58.64	164 38.51	Siderite-magnetite-sphalerite-pyrite	1.42	0.21	66.42	2.822	2.63	4.72	< 0.01	< 0.01	0.017	< 0.01	21.09	99.24	0.61	7.78	< 0.05	< 0.05	< 0.05	28	2.45	5.64	< 1	5	15	5.2	5	< 1	55	7710	3.7	85	732	< 2	4.8	< 3	4.5	2	1.7	< 1	41	< 4	< 0.2	< 2	< 0.1	5	0.9
JS-05-77B	Wheeler North	64 58.64	164 38.51	Massive pyrite-siderite-sphalerite-galena	1.29	0.13	74.86	0.736	0.73	2.73	0.04	< 0.01	0.011	< 0.01	24.78	98.69	0.09	2.33	< 0.05	< 0.05	< 0.05	7.73	36.5	3.71	< 1	33	< 5	1.5	28	24	47	3620	22	8460	842	43	216	< 3	102	1	0.8	2	29	10	< 0.2	< 2	< 0.1	< 1	0.4
JS-05-77C	Wheeler North	64 58.64	164 38.51	Quartz-ankerite-barite-sphalerite-pyrite-galena	47.39	2.03	5.92	0.396	0.57	17.57	0.08	0.1	0.033	< 0.01	11.35	85.25	0.11	4.26	< 0.05	0.56	0.56	15.5	3.84	8.8	1	11	< 5	4.1	9	3	50	32800	10.4	3800	2390	23	34.6	< 3	26	3	7.1	4	218	16	0.4	< 2	< 0.1	2	0.4
JS-05-77E	Wheeler North	64 58.64	164 38.51	Fluorite-quartz-pyrite-sphalerite-galena-sulfosalt	37.51	1	9.58	0.083	0.06	21.15	0.08	0.13	0.05	< 0.01	10.57	80.22	19.4	1.22	< 0.05	0.09	0.09	4.24	14	14.2	1	12	42	2.2	13	4	32	55100	29.7	15400	5030	24	384	< 3	415	2	9.3	6	37	18	1.5	< 2	< 0.1	6	0.2
JS-05-77G	Wheeler North	64 58.64	164 38.51	Quartz-calcite-magnetite-sphalerite-pyrite	24.82	0.5	33.56	1.344	1.47	12.22	0.07	< 0.01	0.023	< 0.01	12.11	86.11	0.48	5.18	< 0.05	< 0.05	< 0.05	19.4	3.46	9.2	< 1	18	23	3.5	22	2	30	42900	3.2	574	3590	< 2	12	< 3	37.2	2	4	< 1	114	13	0.4	< 2	0.2	8	< 0.1
JS-07-17A	Wheeler North	64 58.64	164 38.51	Quartz-calcite-siderite-fluorite-pyrite-sphalerite	61.56	2.08	9.13	0.122	0.15	13.27	0.04	0.59	0.142	0.02	10.19	97.29	2.86	2.05	0.06	0.05	0.11	7.32	7.41	11.6	< 1	35	12	2.7	< 20	7	380	6660	9.1	596	1580	< 2	33.7	< 3	172	4	1.6	34	154	41	1.7	< 2	< 0.1	< 1	4.4
JS-07-17C	Wheeler North	64 58.64	164 38.51	Quartz-calcite-fluorite-sphalerite-galena	71.48	1.26	1.97	0.168	0.53	11.29	0.03	0.3	0.059	0.01	8.49	95.57	4.96	1.69	0.23	0.11	0.34	5.36	2.07	5.3	< 1	13	72	3.4	< 20	3	30	34500	6.4	2880	1480	< 2	10.8	< 3	10.4	5	15	16	45	16	1.8	< 2	< 0.1	< 1	1.4
JS-07-17D	Wheeler North	64 58.64	164 38.51	Siderite-quartz-magnetite-barite-sphalerite-pyrite	19.1	2.19	39.57	1.347	1.25	10.89	< 0.01	0.04	0.05	< 0.01	9.5	83.89	0.69	4.84	0.07	< 0.05	0.07	17.6	2.7	7.5	< 1	19	< 5	2.9	< 20	1	10	32800	0.9	18	2780	< 2	9.6	< 3	13.3	5	2.5	2	112	15	0.4	< 2	0.2	11	0.2
JS-07-17G	Wheeler North	64 58.64	164 38.51	Siderite-pyrite-sphalerite	4.66	0.07	65.43	2.562	1.97	2.61	< 0.01	0.04	0.007	< 0.01	23.49	100.8	0.26	7.71	0.05	0.11	0.16	28	3.95	7.2	< 1	11	20	3.7	< 20	< 1	20	3100	< 0.5	13	127	< 2	3.4	< 3	2.6	4	1.2	2	20	< 1	< 0.2	< 2	< 0.1	< 1	0.2
JS-07-17H	Wheeler North	64 58.64	164 38.51	Siderite-quartz-pyrite-sphalerite	16.85	0.42	58.75	0.677	0.58	0.61	< 0.01	0.07	0.031	< 0.01	27.45	> 101.0	0.14	2.35	< 0.05	0.07	0.07	7.79	32.3	13.2	< 1	17	70	1.2	20	101	40	1780	0.7	1580	424	42	258	< 3	118	2	2.1	3	4	15	0.3	5	< 0.1	3	0.6
JS-07-18B	Wheeler North	64 58.56	164 38.37	Siderite-calcite-galena-pyrite-sphalerite-sulfosalt	8.76	1.29	27.04	1.857	4.44	19.49	0.03	0.11	0.067	< 0.01	23.39	86.46	0.49	8.96	< 0.05	0.18	0.18	32.8	3.48	8.9	< 1	8	< 5	1.1	< 20	< 1	200	11600	230	84400	444	< 2	68.2	< 3	1000	2	< 0.5	7	102	15	1	< 2	< 0.1	9	0.6
JS-07-18C	Wheeler North	64 58.56	164 38.37	Fluorite-calcite-galena-sulfosalt-pyrite	9.32	1.51	16.06	0.914	0.96	26.76	0.25	0.32	0.087	0.02	-1.2	55.02	22.3	2.77	0.07	0.14	0.21	9.69	3.63	10.5	< 1	11	29	1.4	< 20	1	40	410	700	218000	37	102	108	3	906	3	< 0.5	19	27	27	6.6	< 2	< 0.1	11	2.2
JS-07-18D	Wheeler North	64 58.56	164 38.37	Siderite-dolomite-pyrite-sphalerite-galena-sulfosalt	10.14	0.91	32.68	2.013	3.94	17.35	0.02	0.02	0.059	< 0.01	25.02	92.12	0.34	8.91	< 0.05	0.28	0.28	33	3.21	7.6	< 1	8	15	1.3	30	< 1	130	11100	100	8480	560	< 2	27.7	< 3	557	2	0.5	5	128	12	0.6	13	< 0.1	15	0.2
JS-06-18A	Nelson	64 45.88	164 23.31	Calcite-dolomite-sphalerite-pyrite-galena-sulfosalt	1.46	0.42	2.45	0.569	6.1	51.58	< 0.01	0.01	0.011	< 0.01	32.03	94.57	0.02	11.3	< 0.05	0.15	0.15	39.7	4.15	11.5	< 1	< 5	< 5	0.4	1	< 1	33	51500	21.7	12100	2390	108	158	< 3	1200	1	< 0.5	3	454	7	0.6	< 2	< 0.1	6	< 0.1
JS-06-18D	Nelson	64 45.88	164 23.31	Calcite-dolomite-galena-sphalerite-sulfosalt	11.82	0.31	1.96	0.445	6.43	40.86	0.03	0.07	0.011	< 0.01	34.56	96.47	0.02	10.9	0.13	0.11	0.24	37.9	1.41	4	< 1	< 5	< 5	0.2	< 1	< 1	7	6520	14.9	23600	167	25	33.5	< 3	330	< 1	< 0.5	3	491	< 4	0.4	2	< 0.1	7	< 0.1
JS-06-20	Nelson	64 52.33	165 23.39	Calcite-sphalerite	8.28	0.3	1.6	0.523	2.09	50.1	0.02	0.05	0.01	< 0.01	31.1	94.04	0.02	10.3	< 0.05	< 0.05	< 0.05	39.4	2.9	8.6	< 1	< 5	17	0.3	< 1	< 1	39	40800	2.3	308	799	14	11.4	< 3	8.1	< 1	< 0.5	4	487	4	< 0.2	< 2	< 0.1	8	< 0.1
JS-07-19B	Nelson	64 45.88	165 23.31	Calcite-dolomite-galena-sphalerite-pyrite-sulfosalt	13.39	1.3	3.69	0.476	9.42	25.29	0.04	0.18	0.036	< 0.01	38.57	92.39	0.14	9.09	0.08	0.52	0.6	33	3.56	8.7	< 1	7	< 5	0.3	< 20	< 1	30	36500	26	70900	554	75	137	< 3	408	1	< 0.5	5	210	10	0.4	< 2	< 0.1	16	0.1
BLC-32-160.5	Bluff	64 34.73	163 44.75	Quartz-chlorite-galena-sphalerite-pyrite-chalcopyrite-pyrite	82.38	2.57	1.02	0.014	0.37	1.63	0.21	0.56	0.144	0.04	2.95	91.88	0.03	0.64	< 0.05	< 0.05	< 0.05	2.04	0.89	2.6	< 1	22	24	1.2	17	7	554	23000	23.6	27700	7150	29	25.6	< 3	49.1	5	1.6	22	31	48	2.7	< 2	< 0.1	1	1.1
BLC-34-174.0	Bluff	64 34.73	163 44.75	Quartz-chlorite-sphalerite-galena-pyrite-chalcopyrite	81.86	3.91	1	0.022	0.25	2.64	0.2	0.83	0.207	0.07	4.05	95.04	0.04	0.82	0.06	0.07	0.13	2.22	1.2	3.7	< 1	30	66	2.1	20	19	731	38600	10.1	9850	8050	25	29.6	< 3	38.8	12	1.9	34	45	59	5	< 2	< 0.1	2	1.7
BLC-34-175.5	Bluff	64 34.73	163 44.75	Quartz-chlorite-sphalerite-galena-pyrite	68.62	2.64	1.23	0.004	0.12	0.66	0.05	0.47	0.132	0.07	3.7	77.69	0.03	0.19	0.05	< 0.05	0.05	0.32	4.19	0.3	< 1	26	16	0.9	13	21	304	102000	34.5	40400	23800	36	16.2	< 3	50.2	13	2.2	23	22	35	2.9	< 2	< 0.1	2	1.3
(1) Location is given in degrees and decimal minutes (NAD 27). Longitude is in degrees west; this number should be expressed as negative in GIS.
[truncated: 23 more columns]
